# Supplementary material
Source: ML conference proceedings conference paper supplement (https://openreview.net/forum?id=3Aoft6NWFej)
Supplement: supplementary_material [file attachment]

## Sheet: Sheet1
	pmi:			bpe:
	0	the		0	the
	1	.		1	.
	2	,		2	,
	3	and		3	of
	4	in		4	and
	5	of		5	in								,
	6			6	to								,
	7	a		7	a								,
	8	to		8									,
	9	was		9	was								,
	10	is		10	-								,
	11	he		11	is								,
	12	s		12	he								,
	13	it		13	for								,
	14	for		14	on								,
	15	)		15	as								,
	16	(		16									,
	17			17	that								,
	18	that		18	s								,
	19	with		19	with								,
	20	-		20	it								,
	21	as		21	i								,
	22	on		22	his								,
	23	“		23	)								,
	24	”		24	(								,
	25	from		25	by								,
	26	at		26	’								,
	27	his		27	at								,
	28	by		28	from								,
	29	i		29	“								,
	30	’		30	”								,
	31	but		31	her								,
	32	:		32	she								,
	33	this		33	you								,
	34	she		34	an								,
	35	her		35	had								,
	36	?		36	be								,
	37	which		37	were								,
	38	had		38	this								,
	39	or		39	are								,
	40	are		40	but								,
	41	were		41	they								,
	42	you		42	not								,
	43	one		43	which								,
	44	;		44	or								,
	45	they		45	have								,
	46	all		46	one								,
	47	–		47	:								,
	48	their		48	t								,
	49	when		49	?								,
	50	also		50	their								,
	51	not		51	all								,
	52	first		52	has								,
	53	after		53	also								,
	54	have		54	first								,
	55	then		55	who								,
	56	who		56	him								,
	57	him		57	my								,
	58	has		58	up								,
	59	its		59	after								,
	60	be		60	there								,
	61	said		61	when								,
	62	so		62	out								,
	63	/		63	been								,
	64	two		64	we								,
	65	!		65	its								,
	66	only		66	two								,
	67	them		67	into								,
	68	some		68	;								,
	69	new		69	would								,
	70	there		70	new								,
	71	%		71	me								,
	72	an		72	time								,
	73	what		73	–								,
	74	out		74	what								,
	75	me		75	other								,
	76	time		76	about								,
	77	other		77	so								,
	78	into		78	can								,
	79	my		79	no								,
	80	now		80	more								,
	81	about		81	then								,
	82	_		82	over								,
	83	while		83	them								,
	84	like		84	if								,
	85	just		85	said								,
	86	if		86	only								,
	87	up		87	some								,
	88	no		88	like								,
	89	over		89	back								,
	90	during		90	1								,
	91	we		91	will								,
	92	made		92	where								,
	93	before		93	during								,
	94	both		94	do								,
	95	where		95	may								,
	96	through		96	could								,
	97	people		97	before								,
	98	however		98	just								,
	99	1		99	made								,
	100	work		100	than								,
	101	because		101	/								,
	102	would		102	years								,
	103	2		103	through								,
	104	including		104	most								,
	105	—		105	!								,
	106	back		106	now								,
	107	‘		107	well								,
	108	used		108	school								,
	109	more		109	while								,
	110	being		110	world								,
	111	these		111	2								,
	112	later		112	people								,
	113	most		113	three								,
	114	many		114	year								,
	115	called		115	%								,
	116	three		116	between								,
	117	your		117	your								,
	118	us		118	such								,
	119	\		119	later								,
	120	3		120	these								,
	121	city		121	many								,
	122	still		122	being								,
	123	again		123	down								,
	124	do		124	under								,
	125	*		125	m								,
	126	another		126	did								,
	127	between		127	_								,
	128	under		128	city								,
	129	around		129	d								,
	130	will		130	part								,
	131	became		131	used								,
	132	until		132	both								,
	133	world		133	state								,
	134	man		134	around								,
	135	family		135	3								,
	136	group		136	how								,
	137	house		137	second								,
	138	d		138	known								,
	139	way		139	us								,
	140	$		140	against								,
	141	left		141	work								,
	142	school		142	know								,
	143	life		143	until								,
	144	team		144	national								,
	145	use		145	way								,
	146	since		146	day								,
	147	even		147	off								,
	148	&		148	get								,
	149	our		149	any								,
	150	second		150	became								,
	151	…		151	university								,
	152	here		152	even								,
	153	year		153	man								,
	154	each		154	see								,
	155	found		155	don								,
	156	area		156	team								,
	157	any		157	life								,
	158	see		158	re								,
	159	name		159	long								,
	160	following		160	because								,
	161	day		161	born								,
	162	did		162	since								,
	163	although		163	season								,
	164	home		164	united								,
	165	company		165	family								,
	166	series		166	still								,
	167	]		167	south								,
	168	[		168	american								,
	169	same		169	high								,
	170	film		170	war								,
	171	state		171	5								,
	172	those		172	film								,
	173	well		173	4								,
	174	can		174	however								,
	175	may		175	each								,
	176	began		176	name								,
	177	game		177	including								,
	178	right		178	head								,
	179	such		179	same								,
	180	against		180	states								,
	181	town		181	took								,
	182	took		182	house								,
	183	4		183	again								,
	184	though		184	go								,
	185	off		185	right								,
	186	good		186	called								,
	187	four		187	north								,
	188	held		188	place								,
	189	season		189	our								,
	190	down		190	four								,
	191	show		191	found								,
	192	place		192	another								,
	193	several		193	much								,
	194	5		194	home								,
	195	within		195	—								,
	196	last		196	area								,
	197	won		197	left								,
	198	men		198	very								,
	199	how		199	group								,
	200	god		200	following								,
	201	go		201	end								,
	202	building		202	several								,
	203	started		203	‘								,
	204	book		204	make								,
	205	asked		205	those								,
	206	line		206	number								,
	207	government		207	won								,
	208	love		208	here								,
	209	music		209	good								,
	210	club		210	de								,
	211	set		211	began								,
	212	form		212	series								,
	213	once		213	company								,
	214	10		214	take								,
	215	early		215	6								,
	216	best		216	old								,
	217	played		217	own								,
	218	song		218	game								,
	219	using		219	didn								,
	220	album		220	played								,
	221	long		221	music								,
	222	6		222	last								,
	223	band		223	released								,
	224	great		224	use								,
	225	church		225	away								,
	226	came		226	album								,
	227	thought		227	never								,
	228	john		228	early								,
	229	system		229	west								,
	230	could		230	going								,
	231	water		231	best								,
	232	play		232	side								,
	233	given		233	too								,
	234	near		234	10								,
	235	children		235	small								,
	236	north		236	came								,
	237	others		237	held								,
	238	too		238	government								,
	239	old		239	\								,
	240	south		240	men								,
	241	road		241	little								,
	242	power		242	district								,
	243	something		243	eyes								,
	244	room		244	hand								,
	245	members		245	county								,
	246	country		246	0								,
	247	having		247	john								,
	248	included		248	league								,
	249	than		249	7								,
	250	#		250	*								,
	251	lost		251	based								,
	252	without		252	few								,
	253	>		253	town								,
	254	history		254	along								,
	255	head		255	went								,
	256	side		256	general								,
	257	district		257	god								,
	258	national		258	line								,
	259	come		259	set								,
	260	king		260	march								,
	261	local		261	water								,
	262	<		262	come								,
	263	m		263	8								,
	264	#ERROR!		264	father								,
	265	never		265	show								,
	266	next		266	next								,
	267	women		267	think								,
	268	war		268	air								,
	269	former		269	club								,
	270	support		270	east								,
	271	often		271	five								,
	272	village		272	ll								,
	273	received		273	within								,
	274	7		274	church								,
	275	himself		275	september								,
	276	run		276	great								,
	277	years		277	$								,
	278	include		278	age								,
	279	west		279	public								,
	280	son		280	looked								,
	281	went		281	u								,
	282	night		282	asked								,
	283	station		283	june								,
	284	get		284	january								,
	285	much		285	something								,
	286	today		286	thought								,
	287	white		287	face								,
	288	five		288	large								,
	289	2010		289	want								,
	290	top		290	october								,
	291	instead		291	system								,
	292	led		292	august								,
	293	put		293	july								,
	294	river		294	station								,
	295	always		295	located								,
	296	say		296	book								,
	297	final		297	international								,
	298	yes		298	college								,
	299	known		299	member								,
	300	service		300	band								,
	301	major		301	should								,
	302	c		302	every								,
	303	got		303	got								,
	304	front		304	party								,
	305	high		305	without								,
	306	general		306	black								,
	307	original		307	&								,
	308	black		308	april								,
	309	land		309	…								,
	310	died		310	top								,
	311	released		311	though								,
	312	help		312	children								,
	313	8		313	river								,
	314	course		314	9								,
	315	2006		315	population								,
	316	story		316	women								,
	317	woman		317	november								,
	318	american		318	former								,
	319	different		319	building								,
	320	built		320	death								,
	321	2011		321	york								,
	322	university		322	room								,
	323	little		323	century								,
	324	among		324	0								,
	325	either		325	started								,
	326	live		326	named								,
	327	car		327	december								,
	328	named		328	love								,
	329	2008		329	local								,
	330	2009		330	white								,
	331	party		331	let								,
	332	third		332	son								,
	333	population		333	single								,
	334	2012		334	e								,
	335	12		335	once								,
	336	open		336	times								,
	337	london		337	2010								,
	338	published		338	due								,
	339	light		339	ve								,
	340	business		340	song								,
	341	b		341	although								,
	342	project		342	am								,
	343	2007		343	why								,
	344	case		344	built								,
	345	president		345	different								,
	346	face		346	order								,
	347	every		347	night								,
	348	making		348	need								,
	349	east		349	received								,
	350	community		350	british								,
	351	9		351	look								,
	352	college		352	12								,
	353	french		353	power								,
	354	small		354	final								,
	355	park		355	service								,
	356	works		356	body								,
	357	inside		357	major								,
	358	body		358	moved								,
	359	look		359	village								,
	360	british		360	main								,
	361	office		361	road								,
	362	born		362	third								,
	363	2013		363	open								,
	364	yet		364	law								,
	365	outside		365	2011								,
	366	law		366	served								,
	367	0		367	president								,
	368	site		368	having								,
	369	why		369	help								,
	370	opened		370	members								,
	371	development		371	died								,
	372	2005		372	say								,
	373	students		373	c								,
	374	very		374	himself								,
	375	center		375	]								,
	376	2014		376	18								,
	377	air		377	february								,
	378	based		378	must								,
	379	position		379	[								,
	380	street		380	20								,
	381	|		381	2012								,
	382	field		382	football								,
	383	things		383	play								,
	384	international		384	king								,
	385	program		385	saw								,
	386	region		386	near								,
	387	full		387	often								,
	388	finally		388	point								,
	389	further		389	land								,
	390	joined		390	put								,
	391	record		391	together								,
	392	together		392	15								,
	393	main		393	door								,
	394	point		394	red								,
	395	saw		395	late								,
	396	really		396	games								,
	397	island		397	young								,
	398	production		398	find								,
	399	11		399	led								,
	400	start		400	turned								,
	401	2015		401	mother								,
	402	2004		402	2013								,
	403	change		403	include								,
	404	england		404	form								,
	405	mr		405	st								,
	406	present		406	country								,
	407	free		407	2008								,
	408	six		408	light								,
	409	father		409	2009								,
	410	act		410	far								,
	411	added		411	species								,
	412	class		412	2014								,
	413	along		413	front								,
	414	created		414	according								,
	415	india		415	park								,
	416	continued		416	history								,
	417	young		417	among								,
	418	public		418	days								,
	419	gave		419	six								,
	420	established		420	behind								,
	421	german		421	army								,
	422	words		422	30								,
	423	games		423	given								,
	424	p		424	published								,
	425	big		425	11								,
	426	end		426	become								,
	427	fire		427	b								,
	428	become		428	art								,
	429	20		429	run								,
	430	brought		430	things								,
	431	across		431	2015								,
	432	death		432	felt								,
	433	thus		433	street								,
	434	appeared		434	ever								,
	435	15		435	2006								,
	436	sent		436	full								,
	437	english		437	included								,
	438	working		438	half								,
	439	design		439	told								,
	440	e		440	english								,
	441	county		441	2007								,
	442	move		442	short								,
	443	already		443	knew								,
	444	married		444	o								,
	445	large		445	center								,
	446	hand		446	central								,
	447	various		447	across								,
	448	past		448	others								,
	449	actually		449	court								,
	450	ground		450	french								,
	451	division		451	really								,
	452	turned		452	division								,
	453	california		453	2016								,
	454	2016		454	non								,
	455	title		455	office								,
	456	role		456	free								,
	457	order		457	gave								,
	458	society		458	car								,
	459	event		459	making								,
	460	canada		460	25								,
	461	australia		461	16								,
	462	control		462	lost								,
	463	behind		463	business								,
	464	close		464	does								,
	465	person		465	opened								,
	466	france		466	million								,
	467	formula		467	live								,
	468	door		468	original								,
	469	half		469	always								,
	470	sometimes		470	story								,
	471	2003		471	co								,
	472	times		472	community								,
	473	ship		473	human								,
	474	everything		474	continued								,
	475	species		475	using								,
	476	2000		476	14								,
	477	part		477	wanted								,
	478	playing		478	per								,
	479	almost		479	seen								,
	480	maybe		480	enough								,
	481	itself		481	career								,
	482	16		482	development								,
	483	produced		483	german								,
	484	14		484	tell								,
	485	real		485	class								,
	486	states		486	might								,
	487	army		487	woman								,
	488	child		488	13								,
	489	late		489	upon								,
	490	james		490	big								,
	491	germany		491	council								,
	492	battle		492	24								,
	493	eventually		493	returned								,
	494	art		494	level								,
	495	ever		495	london								,
	496	going		496	students								,
	497	word		497	research								,
	498	david		498	better								,
	499	living		499	support								,
	500	director		500	mind								,
	501	13		501	give								,
	502	especially		502	worked								,
	503	style		503	fire								,
	504	de		504	record								,
	505	call		505	voice								,
	506	probably		506	cup								,
	507	away		507	almost								,
	508	girl		508	living								,
	509	study		509	2017								,
	510	take		510	field								,
	511	wrote		511	control								,
	512	future		512	ii								,
	513	moved		513	established								,
	514	money		514	sure								,
	515	oh		515	title								,
	516	better		516	force								,
	517	recorded		517	hands								,
	518	#ERROR!		518	role								,
	519	level		519	nothing								,
	520	t		520	military								,
	521	taking		521	soon								,
	522	make		522	island								,
	523	enough		523	act								,
	524	league		524	further								,
	525	character		525	various								,
	526	despite		526	able								,
	527	non		527	case								,
	528	2002		528	working								,
	529	research		529	player								,
	530	stop		530	17								,
	531	sound		531	written								,
	532	turn		532	education								,
	533	reached		533	total								,
	534	remained		534	created								,
	535	formed		535	period								,
	536	18		536	close								,
	537	2001		537	western								,
	538	upon		538	round								,
	539	process		539	important								,
	540	leading		540	married								,
	541	dr		541	award								,
	542	hit		542	wasn								,
	543	short		543	call								,
	544	court		544	wife								,
	545	2017		545	works								,
	546	placed		546	already								,
	547	plan		547	real								,
	548	located		548	region								,
	549	sold		549	produced								,
	550	modern		550	television								,
	551	type		551	hard								,
	552	lead		552	program								,
	553	list		553	least								,
	554	race		554	radio								,
	555	china		555	joined								,
	556	books		556	heart								,
	557	usually		557	ground								,
	558	section		558	political								,
	559	let		559	director								,
	560	information		560	rock								,
	561	single		561	looking								,
	562	mother		562	san								,
	563	above		563	social								,
	564	lake		564	anything								,
	565	beginning		565	2005								,
	566	model		566	appeared								,
	567	followed		567	person								,
	568	br		568	position								,
	569	soon		569	taken								,
	570	met		570	hall								,
	571	central		571	special								,
	572	food		572	100								,
	573	current		573	win								,
	574	eyes		574	ten								,
	575	events		575	inside								,
	576	writing		576	less								,
	577	human		577	thing								,
	578	construction		578	announced								,
	579	performance		579	england								,
	580	therefore		580	wrote								,
	581	number		581	today								,
	582	developed		582	keep								,
	583	quickly		583	society								,
	584	win		584	site								,
	585	red		585	department								,
	586	someone		586	course								,
	587	space		587	done								,
	588	TRUE		588	project								,
	589	mark		589	production								,
	590	records		590	james								,
	591	ran		591	followed								,
	592	features		592	feel								,
	593	lord		593	post								,
	594	songs		594	yet								,
	595	30		595	brother								,
	596	voice		596	present								,
	597	0		597	election								,
	598	player		598	board								,
	599	force		599	association								,
	600	release		600	union								,
	601	dead		601	2018								,
	602	1999		602	either								,
	603	read		603	p								,
	604	michael		604	information								,
	605	uk		605	considered								,
	606	japan		606	described								,
	607	track		607	police								,
	608	hall		608	past								,
	609	throughout		609	19								,
	610	table		610	lead								,
	611	council		611	championship								,
	612	paul		612	21								,
	613	told		613	summer								,
	614	hospital		614	#								,
	615	17		615	instead								,
	616	captain		616	royal								,
	617	written		617	green								,
	618	everyone		618	23								,
	619	leaving		619	reached								,
	620	magazine		620	outside								,
	621	nothing		621	battle								,
	622	towards		622	2004								,
	623	special		623	common								,
	624	military		624	change								,
	625	common		625	founded								,
	626	felt		626	22								,
	627	education		627	towards								,
	628	earth		628	list								,
	629	worked		629	finally								,
	630	stage		630	version								,
	631	police		631	match								,
	632	fact		632	al								,
	633	think		633	ran								,
	634	association		634	#ERROR!								,
	635	r		635	words								,
	636	strong		636	space								,
	637	considered		637	word								,
	638	dark		638	playing								,
	639	fight		639	rest								,
	640	know		640	taking								,
	641	period		641	2000								,
	642	killed		642	news								,
	643	should		643	modern								,
	644	william		644	above								,
	645	age		645	dark								,
	646	players		646	star								,
	647	1998		647	language								,
	648	finished		648	g								,
	649	running		649	sent								,
	650	green		650	return								,
	651	movement		651	william								,
	652	services		652	india								,
	653	thomas		653	money								,
	654	days		654	northern								,
	655	boy		655	services								,
	656	whose		656	low								,
	657	experience		657	>								,
	658	board		658	america								,
	659	alone		659	28								,
	660	closed		660	yes								,
	661	george		661	race								,
	662	language		662	leave								,
	663	does		663	someone								,
	664	seen		664	professional								,
	665	match		665	design								,
	666	featured		666	start								,
	667	entered		667	la								,
	668	kept		668	seven								,
	669	shows		669	sound								,
	670	wall		670	child								,
	671	peter		671	example								,
	672	seven		672	26								,
	673	1997		673	sat								,
	674	europe		674	j								,
	675	via		675	similar								,
	676	says		676	southern								,
	677	available		677	brought								,
	678	stopped		678	heard								,
	679	offered		679	event								,
	680	performed		680	27								,
	681	whole		681	george								,
	682	certain		682	lord								,
	683	base		683	blue								,
	684	friends		684	sea								,
	685	provided		685	middle								,
	686	term		686	video								,
	687	means		687	australia								,
	688	v		688	everything								,
	689	nature		689	formed								,
	690	shot		690	<								,
	691	daughter		691	months								,
	692	jack		692	stop								,
	693	bridge		693	france								,
	694	hold		694	european								,
	695	action		695	daughter								,
	696	complete		696	result								,
	697	competition		697	recorded								,
	698	1996		698	moment								,
	699	centre		699	r								,
	700	been		700	term								,
	701	heart		701	rather								,
	702	required		702	decided								,
	703	stood		703	week								,
	704	training		704	couldn								,
	705	perhaps		705	california								,
	706	range		706	l								,
	707	includes		707	finished								,
	708	leader		708	turn								,
	709	blood		709	formula								,
	710	middle		710	elected								,
	711	25		711	move								,
	712	meeting		712	hit								,
	713	attack		713	mr								,
	714	network		714	fact								,
	715	passed		715	despite								,
	716	possible		716	eventually								,
	717	idea		717	girl								,
	718	allowed		718	gold								,
	719	tour		719	david								,
	720	themselves		720	met								,
	721	standard		721	earth								,
	722	initially		722	areas								,
	723	hard		723	lake								,
	724	yeah		724	wall								,
	725	1995		725	trying								,
	726	market		726	science								,
	727	practice		727	food								,
	728	schools		728	style								,
	729	robert		729	x								,
	730	areas		730	tried								,
	731	starting		731	developed								,
	732	lived		732	paul								,
	733	g		733	events								,
	734	department		734	friend								,
	735	2018		735	release								,
	736	return		736	forces								,
	737	served		737	popular								,
	738	l		738	throughout								,
	739	date		739	training								,
	740	news		740	average								,
	741	raised		741	doing								,
	742	museum		742	2003								,
	743	mostly		743	health								,
	744	{		744	books								,
	745	1994		745	signed								,
	746	similar		746	currently								,
	747	okay		747	care								,
	748	rock		748	dead								,
	749	particular		749	media								,
	750	meaning		750	chief								,
	751	round		751	v								,
	752	problem		752	blood								,
	753	floor		753	chapter								,
	754	bed		754	canada								,
	755	castle		755	says								,
	756	episode		756	floor								,
	757	cover		757	minister								,
	758	previous		758	stood								,
	759	n		759	available								,
	760	o		760	29								,
	761	question		761	coming								,
	762	view		762	ship								,
	763	hill		763	process								,
	764	post		764	feet								,
	765	radio		765	oh								,
	766	saying		766	possible								,
	767	collection		767	addition								,
	768	important		768	points								,
	769	data		769	records								,
	770	signed		770	killed								,
	771	eight		771	track								,
	772	getting		772	eight								,
	773	mission		773	originally								,
	774	entire		774	50								,
	775	coming		775	usually								,
	776	subject		776	lot								,
	777	western		777	table								,
	778	campaign		778	debut								,
	779	immediately		779	current								,
	780	anything		780	teams								,
	781	low		781	quickly								,
	782	21		782	added								,
	783	report		783	appointed								,
	784	19		784	minutes								,
	785	described		785	friends								,
	786	24		786	remained								,
	787	1992		787	believe								,
	788	election		788	arm								,
	789	media		789	tv								,
	790	summer		790	mid								,
	791	organization		791	stage								,
	792	master		792	type								,
	793	career		793	railway								,
	794	author		794	bed								,
	795	find		795	plan								,
	796	completed		796	character								,
	797	week		797	2002								,
	798	washington		798	sold								,
	799	teams		799	morning								,
	800	energy		800	closed								,
	801	changed		801	songs								,
	802	looked		802	eastern								,
	803	friend		803	self								,
	804	1993		804	study								,
	805	uses		805	2001								,
	806	heard		806	sometimes								,
	807	bill		807	arms								,
	808	texas		808	needed								,
	809	done		809	kind								,
	810	job		810	running								,
	811	simply		811	private								,
	812	earlier		812	f								,
	813	japanese		813	construction								,
	814	foundation		814	h								,
	815	girls		815	schools								,
	816	chinese		816	idea								,
	817	seat		817	placed								,
	818	union		818	seemed								,
	819	star		819	whole								,
	820	stone		820	strong								,
	821	herself		821	maybe								,
	822	success		822	thus								,
	823	particularly		823	deep								,
	824	fear		824	hair								,
	825	result		825	mark								,
	826	award		826	route								,
	827	1990		827	germany								,
	828	paris		828	boy								,
	829	italy		829	bad								,
	830	official		830	31								,
	831	j		831	tour								,
	832	structure		832	cross								,
	833	aircraft		833	probably								,
	834	founded		834	bay								,
	835	property		835	range								,
	836	technology		836	centre								,
	837	sure		837	indian								,
	838	unit		838	40								,
	839	mind		839	hours								,
	840	traditional		840	leading								,
	841	brown		841	means								,
	842	fall		842	sir								,
	843	sun		843	seat								,
	844	largest		844	museum								,
	845	popular		845	mean								,
	846	location		846	action								,
	847	groups		847	designed								,
	848	opening		848	involved								,
	849	charles		849	players								,
	850	operation		850	coach								,
	851	nearby		851	TRUE								,
	852	clear		852	hospital								,
	853	jesus		853	future								,
	854	sea		854	attack								,
	855	female		855	hill								,
	856	points		856	features								,
	857	replied		857	australian								,
	858	22		858	beginning								,
	859	need		859	sun								,
	860	novel		860	official								,
	861	route		861	bank								,
	862	1991		862	getting								,
	863	limited		863	especially								,
	864	spanish		864	province								,
	865	50		865	stone								,
	866	terms		866	energy								,
	867	capital		867	committee								,
	868	key		868	section								,
	869	defeated		869	uk								,
	870	must		870	itself								,
	871	families		871	michael								,
	872	moving		872	rights								,
	873	staff		873	changed								,
	874	remains		874	bar								,
	875	smith		875	|								,
	876	issue		876	wide								,
	877	doing		877	brown								,
	878	thing		878	europe								,
	879	systems		879	else								,
	880	films		880	census								,
	881	european		881	talk								,
	882	henry		882	china								,
	883	h		883	walked								,
	884	truth		884	network								,
	885	looking		885	grand								,
	886	feeling		886	largest								,
	887	material		887	families								,
	888	video		888	lower								,
	889	introduced		889	completed								,
	890	hotel		890	thomas								,
	891	total		891	performed								,
	892	holding		892	performance								,
	893	america		893	longer								,
	894	1989		894	groups								,
	895	re		895	robert								,
	896	co		896	bridge								,
	897	mountain		897	passed								,
	898	below		898	movement								,
	899	cut		899	natural								,
	900	ended		900	alone								,
	901	movie		901	civil								,
	902	drive		902	refer								,
	903	results		903	base								,
	904	individual		904	actually								,
	905	russian		905	festival								,
	906	christian		906	forward								,
	907	blue		907	size								,
	908	library		908	cut								,
	909	giving		909	reported								,
	910	temple		910	herself								,
	911	richard		911	saying								,
	912	ordered		912	kingdom								,
	913	makes		913	lived								,
	914	announced		914	writing								,
	915	loss		915	bit								,
	916	political		916	fourth								,
	917	rose		917	try								,
	918	presence		918	below								,
	919	al		919	1999								,
	920	reported		920	directed								,
	921	winning		921	female								,
	922	paper		922	institute								,
	923	russia		923	el								,
	924	remaining		924	episode								,
	925	x		925	captain								,
	926	ii		926	previous								,
	927	becoming		927	arts								,
	928	k		928	federal								,
	929	u		929	includes								,
	930	private		930	spent								,
	931	100		931	parents								,
	932	doctor		932	toward								,
	933	moment		933	pulled								,
	934	lines		934	everyone								,
	935	1988		935	sports								,
	936	cross		936	fall								,
	937	complex		937	master								,
	938	ten		938	provided								,
	939	characters		939	capital								,
	940	presented		940	dr								,
	941	knew		941	read								,
	942	self		942	washington								,
	943	suddenly		943	data								,
	944	morning		944	studies								,
	945	test		945	mary								,
	946	decision		946	model								,
	947	23		947	whose								,
	948	gold		948	charles								,
	949	mary		949	countries								,
	950	operations		950	kept								,
	951	student		951	sister								,
	952	source		952	medical								,
	953	studies		953	shot								,
	954	pass		954	market								,
	955	tom		955	themselves								,
	956	lower		956	leaving								,
	957	successful		957	bill								,
	958	culture		958	job								,
	959	bank		959	interest								,
	960	camp		960	magazine								,
	961	science		961	independent								,
	962	beyond		962	allowed								,
	963	changes		963	featured								,
	964	fine		964	stated								,
	965	boys		965	degree								,
	966	knowledge		966	competition								,
	967	~		967	k								,
	968	spain		968	academy								,
	969	increased		969	entire								,
	970	houses		970	success								,
	971	direction		971	fell								,
	972	1986		972	replaced								,
	973	1987		973	hear								,
	974	offer		974	fight								,
	975	needed		975	higher								,
	976	mine		976	hold								,
	977	tv		977	w								,
	978	40		978	professor								,
	979	less		979	officer								,
	980	pain		980	via								,
	981	cause		981	peter								,
	982	spirit		982	provide								,
	983	standing		983	raised								,
	984	latter		984	shows								,
	985	valley		985	mouth								,
	986	originally		986	russian								,
	987	helped		987	1998								,
	988	size		988	winning								,
	989	designed		989	staff								,
	990	queen		990	n								,
	991	institute		991	camp								,
	992	festival		992	parts								,
	993	interest		993	matter								,
	994	studio		994	earlier								,
	995	sam		995	pre								,
	996	hands		996	certain								,
	997	forest		997	chinese								,
	998	hope		998	christian								,
	999	train		999	conference								,
													,
													,
													,
													,
													,
													,
