# Supplementary material
Source: ML conference proceedings conference paper supplement (https://openreview.net/forum?id=3Aoft6NWFej)
Supplement: supplementary_material [file bigrams_sample.xlsx]

## Sheet: Sheet1
bigram	Named Entity (NE) tag	Is NE?	NE percent: overall	NE percent: top10%	NE percent: bottom10%
servilius caepio	NAME	1	0.162	0.5	0.01
sanath jayasuriya	NAME	1
tarja turunen	NAME	1
erzgebirge aue	NAME	1
taras bulba	NAME	1
adamlık dini	NAME	1
qian chuanguan	NAME	1
stade lavallois	NAME	1
tian chengsi	NAME	1
unicaja malaga	NAME	1
giancarlo giannini	NAME	1
shi chaoyi	NAME	1
sump lubrication		0
vince guaraldi	NAME	1
hellas verona	NAME	1
schur multiplier		0
santo domingo	NAME	1
lucius verus	NAME	1
diese welt	NAME	1
flame retardants		0
kraft nabisco	NAME	1
cannabis sativa		0
kj mol		0
garcia abrego	NAME	1
sumy oblast	NAME	1
karst topography		0
jenson button	NAME	1
shatabdi express	NAME	1
string quartets		0
eric butorac	NAME	1
vegan diets		0
von mises	NAME	1
malaga cf	NAME	1
ray mabus	NAME	1
patriarch kirill	NAME	1
heroic couplets		0
forfar athletic	NAME	1
elliptic curve		0
jingnan circuit	NAME	1
della valle		0
van barneveld	NAME	1
ananda mohan	NAME	1
functional neuroimaging		0
ocean acidification		0
quispicanchi province	NAME	1
athletics u23		0
tuileries palace	NAME	1
gillian welch	NAME	1
gt3 rs		0
powerboat racing		0
palliative care		0
graph isomorphism		0
blackwall tunnel		0
con gai	NAME	1
governor haydenshire	NAME	1
montevideo wanderers	NAME	1
shaolin monk		0
declassified documents		0
naval shipyard		0
regaining consciousness		0
isfahan province	NAME	1
knee injury		0	N	N
0 cet		0
del magallanes	NAME	1
drained soils		0
dire warnings		0
edwin chadwick	NAME	1
classical philologist		0
patrick warburton	NAME	1
wwf tag		0
increases exponentially		0
skin tingled		0
providence friars	NAME	1
solar flare		0
106 146		0
audio cassette		0
smoothly scaled		0
francis asbury	NAME	1
family prodoxidae		0
de wallonie	NAME	1
skeletal remains		0
networked computers		0
janis ian	NAME	1
photographic plates		0
jaw clenching		0
protestant denomination		0
le chemin	NAME	1
de polignac	NAME	1
christ superstar		0
supernatural thriller		0
warmth radiating		0
botanical specimens		0
hitching post		0
intermittent rivers		0
cuyahoga county	NAME	1
hertha berlin	NAME	1
hanseatic league	NAME	1
sobolev space		0
te tai		0
bestsellers list		0
vacuum expectation		0
pale fawn		0
adrienne rich	NAME	1
writhed beneath		0
mark donohue	NAME	1
edible fruit		0
austrian bundesliga	NAME	1
rockland county	NAME	1
cathy dennis	NAME	1
gould shaw	NAME	1
wedding invitations		0
la piedra	NAME	1
masonic symbols		0
anonymous donors		0
jet engines		0
northbound train		0
church stretton	NAME	1
wireless communications		0
pressure ulcers		0
6th earl		0
champagne bottle		0
council evaluates		0
dvd releases		0
background vocalists		0
plump lips		0
terrorist organizations		0
distinct phases		0
dried mud		0
confucian philosophy		0
artillery pieces		0
iida line	NAME	1
100 metres		0
upland areas		0
geographical regions		0
czestochowa county	NAME	1
joseph biden	NAME	1
told interviewers		0
northwestern ontario	NAME	1
coherence length		0
legislation requiring		0
abnormally large		0
explicit lyrics		0
terrestrial globe		0
nick drake	NAME	1
directly contradicted		0
rbi double		0
retired footballer		0
154 crash		0
209 households		0
scholars attribute		0
current titleholder		0
islamic revolution		0
tear escaped		0
66 66		0
gary peters	NAME	1
late 2000s		0
antarctic ice		0
sherman tank		0
mojo magazine	NAME	1
world cup		0
outstanding performance		0
maria dei	NAME	1
cnn reporter		0
abolitionist newspaper		0
teen praise		0
malik al	NAME	1
vanguard records	NAME	1
305 households		0
siskiyou national		0
eyes fixated		0	N	V/A
frances farmer	NAME	1
vocal range		0
biblical account		0
meteor garden		0
guild award		0
tactical error		0
civilian clothing		0
drug induced		0
available online		0
greater distances		0
whale hunting		0
low ses		0
practical reasons		0
wet blanket		0
stood immobile		0
5 ghz		0
christianity teaches		0
religious imagery		0
internal alterations		0
discuss matters		0
minister winston	NAME	1
tight end		0
filming schedule		0
st anselm		0
particularly gruesome		0
cape fear		0
police magistrate		0
inevitably lead		0
two lovebirds		0
income bracket		0
2004 tsunami		0
populous county	NAME	1
naia football		0
glass partition		0
2nd century		0
outstanding rookie		0
generally speaking		0
mob attacked		0
tearful eyes		0
takeover offer		0
placing 7th		0
sea cadet		0
manuel de		0
far worse		0
turns southeast		0
lottery winner		0
carefully tended		0
land purchases		0
broken limbs		0
university bochum	NAME	1
aesthetic quality		0
factor determining		0
copyright issues		0
blue streaks		0
billy talent	NAME	1
recycling rate		0
aviation regulations		0
lungs burning		0
debates surrounding		0
spiritual experiences		0
resemble those		0
grape leaves		0
breakthrough role		0
slovenian basketball		0
external rotation		0
achieve equality		0
doubles tournament		0
scientific community		0
elected president		0
pass judgement		0	V	N
yellow hairs		0
monty brown		0
hop producers		0
increasingly influential		0
sanctioned events		0
stupid joke		0
primary motive		0
fought against		0
critical essay		0
pointy end		0
useful skill		0
danish embassy		0
free agents		0
lane road		0
attended elementary		0
pale flesh		0
gaston county	NAME	1
folk heroes		0
nottinghamshire county	NAME	1
April 1942		0
provincial congress		0
rail routes		0
grass plains		0
theatrical version		0
reais from		0
original creators		0
strategic vision		0
29th street		0
mars missions		0
fear allah		0
practically unknown		0
arlington park	NAME	1
mainstream appeal		0
slim legs		0
sorties against		0
perfume industry		0
finnish singles		0
ria de		0
experiencing problems		0
these hadiths		0
cruised through		0
medical humanities		0
statement stating		0
attendance zone		0
summer transfer		0
viewing conditions		0
hurrying away		0
common complaint		0
official contexts		0
intellectual discussion		0
professional divers		0
six shooters		0
fans voted		0
media entrepreneur		0
stabilization system		0
causal body		0
economic damages		0
healing techniques		0
four punts		0	NUM	N
jesus speaks		0
little pill		0
5 km²		0
plateau region		0
could inflict		0
finally gotten		0
sixth fastest		0
embedded mountains		0
dominant tribe		0
against impunity		0	P	N
rich agricultural		0
competition caution		0
rickshaws are		0
broadcasting subsidiary		0
historic building		0
showed remarkable		0
death eater		0
independent developers		0
wings stretched		0
somewhere quiet		0
powerful punch		0
solo vocal		0
additional modifications		0
dropped substantially		0
home venue		0
sent messages		0
gotta move		0
cinderella run		0
other autobots		0
engine room		0
60 pounds		0
drew lots		0
night gown		0
explain myself		0
January 1689		0
commend you		0
fourteenth floor		0
residentiary at		0	N	P
being pumped		0
2017 cannes		0
totaled us		0
largely protestant		0
garden path		0
turn away		0
lasted approximately		0
flat shoes		0
divisional level		0
been experimenting		0
provides transportation		0
smooth concrete		0
stress caused		0
an upazila		0
clock rate		0
booted out		0
books relating		0
married jacqueline		0
finnish football		0
limestone creek		0
small sample		0
already awake		0
conventional design		0
actress oscar		0
grown ass		0
james fleming	NAME	1
an irish		0
capitol view		0
let myself		0
southern india	NAME	1
booking system		0
using computers		0
an underground		0
mountain fortress		0
dusty old		0
become engaged		0
other substances		0
bomb test		0
ensure fair		0
retreated behind		0
subsequently translated		0
looked hopeful		0
robert wallace	NAME	1
seth asked		0
straight blonde		0
many iraqis		0
french rapper		0
9 steals		0
located underneath		0
john leslie	NAME	1
an astrolabe		0
overburdened with		0
israeli territory		0
first half		0
800 vehicles		0	NUM	N
32nd place		0
clinging to		0
nearly dropped		0
water diverted		0
popped off		0
to enlist		0
military trainer		0
working jointly		0
duterte said		0
110 countries		0
pleadingly at		0
a rhetor		0	D	N
helped resolve		0
huge stones		0
building constructed		0
grand circus		0
previous novels		0
or omission		0
moving quickly		0
british psychiatrist		0
to unravel		0
8 percent		0
australian armoured		0
storm cat		0	N	N
37 games		0
officially begun		0
becoming ceo		0
members volunteered		0
among whites		0
are yellowish		0
often copied		0
hated him		0
are ambushed		0
cannot choose		0
negative factors		0
old walled		0
an unshaven		0
jump out		0
live aid		0
are arranged		0
formal title		0
air liaison		0
hoodie over		0
its importance		0
pakistan premier		0
measure traffic		0
dead lover		0
fine weather		0
root note		0
trophy twice		0
she dared		0
had rehearsed		0
submarine training		0
could observe		0
also undertook		0
into giggles		0
captain joseph	NAME	1
potential application		0
still possessed		0	ADV	A
our worldly		0
11 season		0
updated model		0
major peaks		0
black cab		0
a conglomeration		0
can veto		0
bran said		0
a blowtorch		0
asian market		0
doctor reveals		0
relatively new		0
my extremities		0	D	N
camera system		0
bold red		0	A	N
means nothing		0
usually shorter		0
nevertheless continued		0
virginia convention		0
just vacated		0
he sighed		0
enhances its		0
tropical songs		0
baltic military		0
opening pages		0
indian monk		0
be forfeited		0
blue cap		0
sever their		0
having originated		0
live anywhere		0
full bore		0
relatively tiny		0
scored 11		0
hand corner		0
common values		0
a divorcee		0
yron had		0
sucking down		0
might call		0
spanish drama		0
scored 82		0
complete set		0
considering taking		0
inmates who		0
limelight when		0
he inched		0
specific elements		0
tournaments played		0
