# Supplementary material
Source: ML conference proceedings conference paper supplement (https://openreview.net/forum?id=3Aoft6NWFej)
Supplement: supplementary_material [file glue_diagnostics.xlsx]

## Sheet: Sheet1
Task	Metric	random span	pmi
Diagnostics Main	Matthew's Corr	39.4	39.9	Main score reported as AX
Lexical Semantics	Matthew's Corr	43.2	41.5	Main sub-category
Knowledge	Matthew's Corr	24.8	33.9	Main sub-category
Logic	Matthew's Corr	35.1	32.7	Main sub-category
Predicate Argument Structure	Matthew's Corr	43.4	44.7	Main sub-category
Lexical Semantics - Lexical Entailment	Matthew's Corr	40.5	35.8
Lexical Semantics - Morphological Negation	Matthew's Corr	74.3	72
Lexical Semantics - Factivity	Matthew's Corr	34.8	20.6
Lexical Semantics - Symmetry/Collectivity	Matthew's Corr	9.1	22
Lexical Semantics - Redundancy	Matthew's Corr	47.6	47.6
Lexical Semantics - Named Entities	Matthew's Corr	14.6	35.8
Lexical Semantics - Quantifiers	Matthew's Corr	61.6	57.9
Predicate-Argument Structure Core Args	Matthew's Corr	35.4	29.8
Predicate-Argument Structure Prepositional Phrases	Matthew's Corr	73.3	75.6
Predicate-Argument Structure Ellipsis/Implicits	Matthew's Corr	35.5	42.1
Predicate-Argument Structure Anaphora/Coreference	Matthew's Corr	40.1	42.9
Predicate-Argument Structure Active/Passive	Matthew's Corr	46.8	46.4
Predicate-Argument Structure Nominalization	Matthew's Corr	56.1	47
Predicate-Argument Structure Genitives/Partitives	Matthew's Corr	68.7	68.7
Predicate-Argument Structure Datives	Matthew's Corr	67.3	67.3
Predicate-Argument Structure Relative Clauses	Matthew's Corr	36.1	36.1
Predicate-Argument Structure Coordination Scopes	Matthew's Corr	36.6	44.6
Predicate-Argument Structure Intersectivity	Matthew's Corr	30.4	30.4
Predicate-Argument Structure Restrictivity	Matthew's Corr	-19	-7.7
Logic Negation	Matthew's Corr	32.7	29.2
Logic Double Negation	Matthew's Corr	80.9	66.1
Logic Interval/Numbers	Matthew's Corr	16.1	9.7
Logic Conjuction	Matthew's Corr	54.9	58
Logic Disjunction	Matthew's Corr	-3.5	-5.4
Logic Conditionals	Matthew's Corr	40.3	30.5
Logic Universal	Matthew's Corr	45.7	66
Logic Existential	Matthew's Corr	48.7	36.6
Logic Temporal	Matthew's Corr	16.5	6.4
Logic Upward Monotone	Matthew's Corr	58.1	53.5
Logic Downward Monotone	Matthew's Corr	-51.8	-61.6
Logic Non-Monotonic	Matthew's Corr	35.6	39.9
Knowledge Common Sense	Matthew's Corr	31.2	43.7
Knowledge World Knowledge	Matthew's Corr	15.2	21.4
