# Supplementary material
Source: ML conference proceedings conference paper supplement (https://openreview.net/forum?id=3Aoft6NWFej)
Supplement: supplementary_material [file trigrams_sample.xlsx]

## Sheet: Sheet1
trigram	Named Entity (NE) tag	Is NE?	NE percent: overall	NE percent: top10%	NE percent: bottom10%
colgate - palmolive	NAME	1	0.142	0.37	0.04
riiser - larsen	NAME	1
heidelberg - konigstuhl	NAME	1
lucius annaeus seneca	NAME	1
christoph von dohnanyi	NAME	1
micrograms per liter		0
intonation scale freq		0
ta ’ zir		0
primera b nacional	NAME	1
huff and puff		0
yaroslav the wise	NAME	1
snot - nosed		0
optional municipal charter		0
desert island discs	NAME	1
optical image stabilization		0
abridged edition ebook		0
ncaa or nfl		0
quarterback ben roethlisberger	NAME	1
lunar and planetary		0
bmt fourth avenue	NAME	1
casper the friendly	NAME	1
messenger of allah		0
retinal ganglion cells		0
super - kamiokande	NAME	1
toronto - dominion	NAME	1
melissa auf der	NAME	1
jee international airport	NAME	1
cardinal - priest		0
atr - 72	NAME	1
sega mega drive	NAME	1
flurry of punches		0
boca del rio	NAME	1
rings of saturn		0
× 100 metre		0
swords and spears		0
vacuum expectation value		0
fiction or fantasy		0
creased his brow		0
prior of crato		0
jewish daily forward	NAME	1
speed manual gearbox		0
hawk - eagle		0
sir john soane	NAME	1
pangs of guilt		0
handover of taiwan		0
sends his regards		0
cmll world heavyweight		0
blinked away tears		0
governor rick scott	NAME	1
mr . pintu	NAME	1
eight or nine		0
herd of goats		0
hawk and dove		0
pope - francis	NAME	1
speakers ' corner		0
clapped her hands		0
la langue francaise		0
flushed the toilet		0
delaware memorial bridge	NAME	1
exploitation and abuse		0
virginia secondary route	NAME	1
streets of laredo	NAME	1
republican mitt romney	NAME	1
7th and 9th		0
exempt from taxation		0
softball and baseball		0
professional road bicycle		0
oak grove cemetery	NAME	1
community newspaper holdings	NAME	1
does that mean		0
bites the dust		0
astronomy and mathematics		0
flat racing champion		0
x - files		0
squadron was reactivated		0
earl of leicester	NAME	1
gas or liquid		0
heard footsteps approaching		0
emergency medical services		0
maintained good relations		0
genus of dragonflies		0
ulster unionist party	NAME	1
famine of 1943		0
aired on nickelodeon		0
east of busko		0
rubbed her forehead		0
execution by hanging		0
justice charles evans	NAME	1
royal thai navy	NAME	1
screamed and screamed		0
swiss national languages		0
interred in arlington		0
flows generally southwest		0
star game selections		0
mille lacs lake	NAME	1
council of trent	NAME	1
shining dark brown		0
duke of carinthia	NAME	1
pay no attention		0
coach knute rockne	NAME	1
representatives representing district		0
publicly traded companies		0
design and fabrication		0
spanish liga acb	NAME	1
pull herself together		0
institute on aging		0
president dixie carter	NAME	1
des plaines river	NAME	1
politician who sat		0
de - guerre		0
plopped down beside		0
auckland rugby league	NAME	1
jerked her chin		0
light - hearted		0
questioned the accuracy		0
received much praise		0
felt a stab		0
poetry in translation		0
ford foundation grant	NAME	1
broadcast on cbc		0
strips of leather		0
tenth studio album		0
scott king award	NAME	1
cannot be verified		0
manner of speaking		0
swear to god		0
prix final champion		0
action lawsuit filed		0
memorial day parade		0
literacy is 85		0
hell is wrong		0
named in honour		0
shares are owned		0
cell phone ringing		0
pga of america	NAME	1
eclipse visible over		0
curled her fingers		0
entire body ached		0
black leather jacket		0
new trier high	NAME	1
swedish handball player		0
african railways placed		0
changed at smashwords		0
injuring his shoulder		0
state of sonora	NAME	1
published in paperback		0
vehicle - borne		0
inter - dimensional		0
moving too fast		0
w - league	NAME	1
level of proficiency		0
multiple star system		0
novelist who wrote		0
crime fiction writer		0
difficult financial situation		0
american rapper jay		0
ride a horse		0
trying to stifle		0
composer and songwriter		0
loss of biodiversity		0
past and future		0
broken the ceasefire		0
highest - earning		0
arrested for assault		0
creator and host		0
much slower rate		0
train shares its		0
issued its decision		0
school program requires		0
serving a sentence		0
reached the pinnacle		0
dry dock co	NAME	1
threatened to withdraw		0
age of consent		0
seeks to preserve		0
eyes raked over		0
trail that leads		0
albanian second division	NAME	1
comforts of home		0
1940 to 1950		0
attempt to conquer		0
began his managerial		0
15 km individual		0
long broad wings		0
audio - video		0
foundation for aids	NAME	1
t - 72s	NAME	1
truman state university	NAME	1
including information storage		0
handled carefully or		0
university of maryland	NAME	1
lowered his sword		0
earl of rochester	NAME	1
wales and northern	NAME	1
forced to rely		0
sort of thing		0
davis cup competition	NAME	1
com or your		0
scoring an own		0
sky was bright		0
fear and worry		0
rapid transit lines		0
dead and gone		0
confirmed on twitter		0
moved ahead toward		0
formed a duo		0
second philippine republic	NAME	1
offerings to include		0
sub - basin		0
top - shelf		0
making a spectacle		0
buried at mount		0
war in abkhazia		0
factory - backed		0
lifting me off		0
an extended illness		0
second stage theatre		0
young and beautiful		0
last scene shows		0
its brief existence		0
trailer was released		0
study and practice		0
sepals which are		0
8 chinese dragon		0
states and localities		0
two main theories		0
raises her hand		0
an unlimited amount		0
give credit where		0
an austrian politician		0
family at ancient		0
struggled to lift		0
ve seen plenty		0
mid and late		0
attempt to mimic		0
world heavyweight boxing		0
resumed his seat		0
calcutta football league	NAME	1
battalion was relieved		0
known from colombia		0
roger ebert awarded	NAME	1
obtain information about		0
e - mohammed	NAME	1
1 , 031		0
dignity and self		0
from approximately 524		0
county metro rail		0
encouraged the growth		0
district and mumbai	NAME	1
an undirected graph		0
open to tourists		0
slightest idea what		0
1923 general election		0
blast of hot		0
spent a year		0
really bad feeling		0
becomes close friends		0
beta - d		0
tasked with supporting		0
their property confiscated		0
creek july 19		0
cluster of stars		0
major junior ice		0
pretty much everything		0
sold in stores		0
than one percent		0
served as chaplain		0
gotten caught up		0
you will excuse		0
1988 federal election		0
arts in belgrade		0
placed her hand		0
born 29 january		0
vocals span from		0
cups my face		0
vietnam veterans against		0
partially inspired by		0
throne of god		0
often not explicitly		0
all that nonsense		0
keeper who played		0
not developed until		0
works in progress		0
few steps behind		0
future of mankind		0
held the seat		0
become increasingly involved		0
designed to integrate		0
distribute ebooks with		0
learn to cope		0
following records were		0
since been rebuilt		0
occupy his time		0
fight winning streak		0
born july 27		0
then turns northwest		0
seeded based on		0
super bowl appearance		0
depicts the lives		0
plans to develop		0
percent of voters		0
made me happy		0
regained his position		0
failing to finish		0
let you die		0
made her wonder		0
new wave scene		0
win the championship		0
must be sacrificed		0
dealt only with		0
had no recollection		0
guitar at age		0
big - band		0
bronze age culture		0
mouth turned down		0
rate of profit		0
decision is final		0
numerous studies have		0
plagued china for		0
additional tutoring for		0
or other entity		0
previously taught at		0
its permanent location		0
intention of doing		0
her previous husband		0
an exceptionally large		0
may occasionally be		0
marine corps personnel		0
winning in straight		0
learned to sing		0
is quite justifiable		0
would ordinarily be		0
will destroy everything		0
watch groups on		0
knows your name		0
into a rage		0
concentrating more on		0
like a freaking		0
have mainly been		0
divided into chapters		0
invited you here		0
five - foot		0
made the headlines		0
has had numerous		0
at seymour johnson	NAME	1
d ' alberto	NAME	1
its international expansion		0
remained a lifelong		0
six inches long		0
three - disc		0
rose of finland		0
thick and strong		0
had four children		0
general court martial		0
changed their plans		0
three points ahead		0
book publishing company		0
complimented the album		0
frozen in time		0
piece of information		0
can move freely		0
class was armed		0
recovered in time		0
as an inker		0
awarded the prize		0
significant impact on		0
pulled his coat		0
english east india	NAME	1
greatly inspired by		0
licensed for use		0
barack obama administration	NAME	1
brought him back		0
hell was happening		0
goods traffic until		0
explanation is given		0
an almost continuous		0
up the ramp		0
state for war		0
than in previous		0
really got me		0
married to jennifer		0
cannot keep up		0
sigh escaped her		0
attempted to purchase		0
never learned how		0
at us universities		0
i thank thee		0
bringing this up		0
federal civil rights		0
drinking the blood		0
on june 21		0
have commanded you		0
come to rely		0
taken up arms		0
visit to egypt		0
mexican grand prix	NAME	1
police and armed		0
for bravery during		0
armed forces bowl	NAME	1
also occasionally played		0
returns to scale		0
hands on either		0
s 200m butterfly		0
their obligations under		0
planning on making		0
route was decommissioned		0
soccer league side		0
i did warn		0
awarded to individuals		0
tier of association		0
foot or so		0
board his ship		0
english legal system		0
james the apostle	NAME	1
plenty of space		0
play an essential		0
only surpassed by		0
an online campaign		0
singing in church		0
is often credited		0
was appointed knight		0
who are believers		0
tackles and six		0
emigrated to germany		0
is it okay		0
most important tasks		0
originally known as		0
become a respected		0
degree in composition		0
everywhere he looked		0
willing to talk		0
grew to love		0
than two hundred		0
s popularity declined		0
smell of wood		0
surviving works are		0
fault him for		0
first legs were		0
trying to assess		0
was again arrested		0
sciences in philadelphia		0
historic and modern		0
was paved between		0
held every sunday		0
by chuck jones	NAME	1
been ruined by		0
its local name		0
opened the bottle		0
who watches over		0
simulcast on both		0
retaining the name		0
by various publishers		0
at a crossroad		0
evidence was found		0
pro - active		0
san antonio silver	NAME	1
who is willing		0
at the meadowlands		0
age of fifty		0
is an obligate		0
relate to standard		0
programs in computer		0
assume the form		0
scientists say that		0
committee on science		0
cut the lead		0
stood facing him		0
were both teachers		0
emptied of its		0
acting in television		0
is also fluent		0
displayed with its		0
able to nominate		0
northern santa fe	NAME	1
before she could		0
such action would		0
degree in politics		0
out of 100		0
hair and wearing		0
after having studied		0
touched her heart		0
refuses to follow		0
cell phone numbers		0
slip - up		0
at the bijou		0
his face twisted		0
elsewhere in england		0
an evolutionary process		0
tied at 2		0
would taste like		0
turned to see		0
establishment of religion		0
chair to sit		0
chapel was designed		0
pair of worn		0
were strewn all		0
non - lgbt		0
by electronic means		0
model was introduced		0
maintaining a high		0
